# Supplementary material
Source: PubMed Central journal article supplement (PMC3182275)
Supplement: neo1309_0831SD1.pdf [file neo1309_0831SD1.pdf]

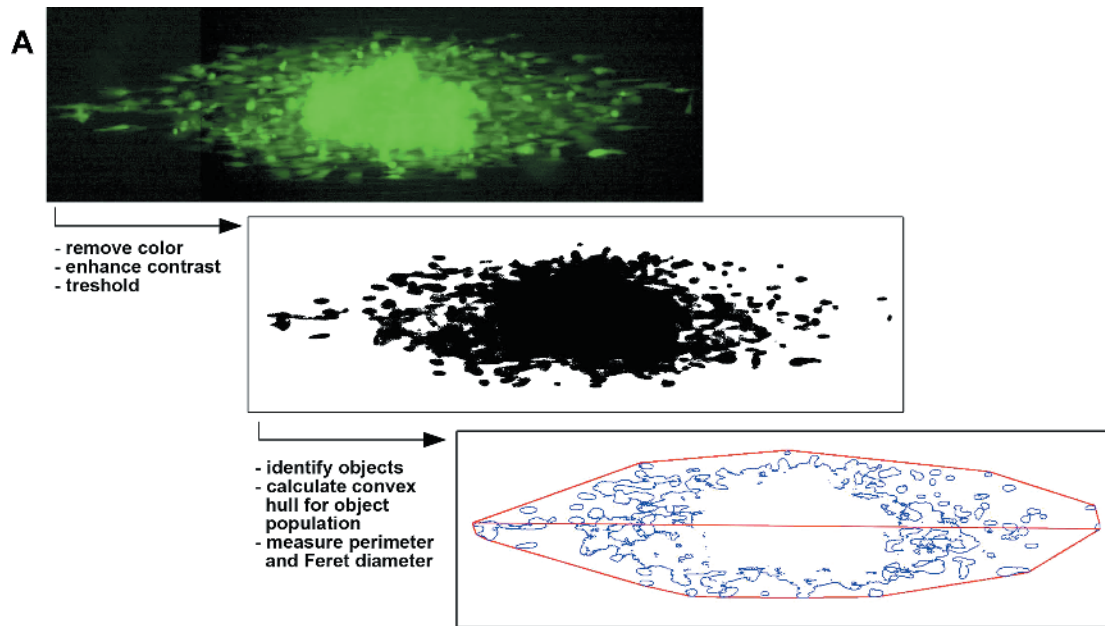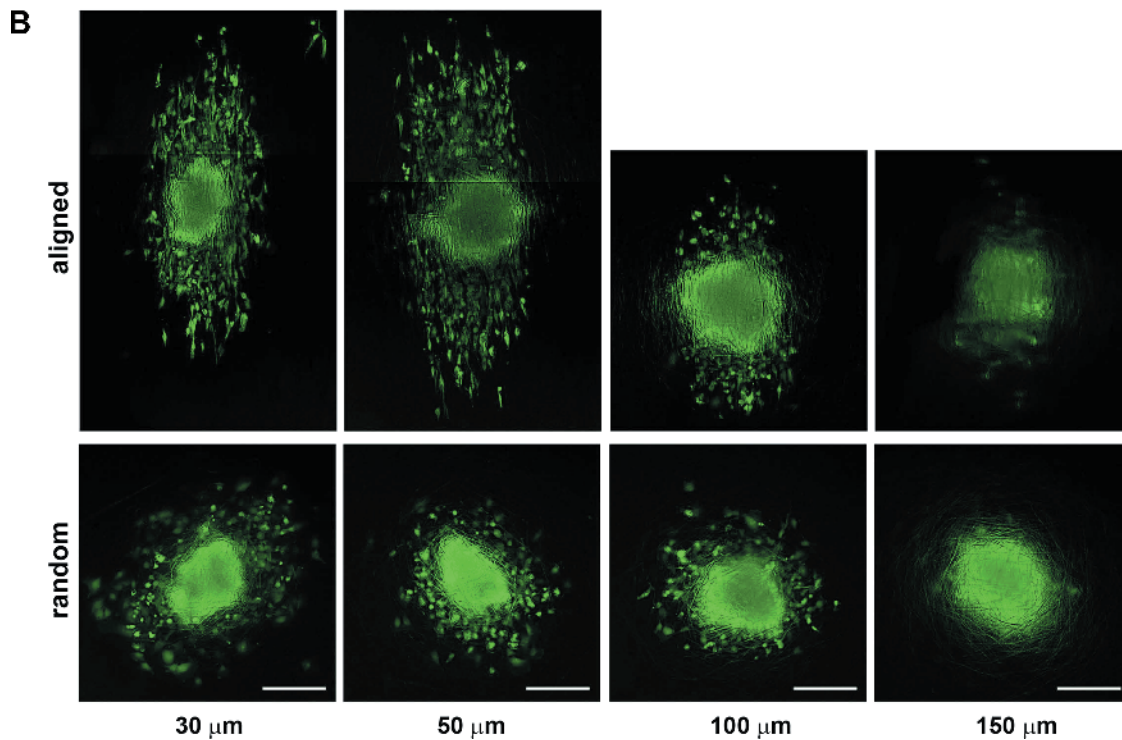

**Figure W1.** Analysis of cell migration on nanofiber scaffolds. (A) Images captured by fluorescence microscopy were analyzed using ImageJ software to quantify cell dispersion from the original spheroid. The maximum dispersion distance is the Feret diameter of the whole cell population at each time point. (B) Representative image of U251 glioma cells dispersing out of aggregates cultured on nanofiber scaffolds of different thickness (30-150  $\mu\text{m}$ ). Notice the elongated profile of cell dispersion on highly aligned nanofibers. Bars, 200  $\mu\text{m}$ .

**Table W1.** Gene Up-regulation in Glioma Cells Migrating on Aligned Nanofibers.

| Gene Symbol     | Entrez Gene Name                                                                   | Location                   | Type(s)                    | Fold Change  | P                 |
|-----------------|------------------------------------------------------------------------------------|----------------------------|----------------------------|--------------|-------------------|
| <b>IL8</b>      | <b>Interleukin 8</b>                                                               | <b>Extracellular space</b> | <b>Cytokine</b>            | <b>3.450</b> | <b>2.38e - 03</b> |
| <i>KLF2</i>     | Kruppel-like factor 2 (lung)                                                       | Nucleus                    | Transcription regulator    | 3.080        | 2.98e - 03        |
| <i>CTH</i>      | Cystathionase (cystathionine gamma-lyase)                                          | Cytoplasm                  | Enzyme                     | 2.780        | 8.53e - 03        |
| <i>BTBD11</i>   | BTB (POZ) domain containing 11                                                     | Nucleus                    | Transcription regulator    | 2.610        | 4.59e - 04        |
| <b>TSLP</b>     | <b>Thymic stromal lymphopoietin</b>                                                | <b>Extracellular space</b> | <b>Cytokine</b>            | <b>2.490</b> | <b>9.96e - 03</b> |
| <i>CBS</i>      | Cystathionine-β-synthase                                                           | Cytoplasm                  | Enzyme                     | 2.450        | 6.64e - 03        |
| <i>TMEM158</i>  | Transmembrane protein 158 (gene/pseudogene)                                        | Plasma membrane            | Other                      | 2.410        | 1.49e - 03        |
| <b>SPHK1</b>    | <b>Sphingosine kinase 1</b>                                                        | <b>Cytoplasm</b>           | <b>Kinase</b>              | <b>2.370</b> | <b>4.99e - 03</b> |
| <i>MGLL</i>     | Monoglyceride lipase                                                               | Plasma membrane            | Enzyme                     | 2.340        | 4.76e - 03        |
| <i>NT5E</i>     | 5'-Nucleotidase, ecto (CD73)                                                       | Plasma membrane            | Phosphatase                | 2.330        | 1.03e - 03        |
| <i>ASNS</i>     | Asparagine synthetase (glutamine-hydrolyzing)                                      | Cytoplasm                  | Enzyme                     | 2.300        | 5.85e - 03        |
| <i>CXCL3</i>    | Chemokine (C-X-C motif) ligand 3                                                   | Extracellular space        | Cytokine                   | 2.250        | 4.44e - 04        |
| <i>PPP1R15A</i> | Protein phosphatase 1, regulatory (inhibitor) subunit 15A                          | Cytoplasm                  | Other                      | 2.210        | 7.16e - 03        |
| <i>CD55</i>     | CD55 molecule, decay accelerating factor for complement                            | Plasma membrane            | Other                      | 2.140        | 7.77e - 03        |
| <i>TRIB3</i>    | Tribbles homolog 3 ( <i>Drosophila</i> )                                           | Nucleus                    | Kinase                     | 2.030        | 7.96e - 03        |
| <i>ALDH1A3</i>  | Aldehyde dehydrogenase 1 family, member A3                                         | Cytoplasm                  | Enzyme                     | 2.020        | 2.27e - 03        |
| <i>NAV3</i>     | Neuron navigator 3                                                                 | Unknown                    | Other                      | 1.990        | 8.22e - 04        |
| <i>CAMK2N1</i>  | Calcium/calmodulin-dependent protein kinase II inhibitor 1                         | Plasma membrane            | Kinase                     | 1.970        | 1.77e - 03        |
| <i>PSAT1</i>    | Phosphoserine aminotransferase 1                                                   | Cytoplasm                  | Enzyme                     | 1.940        | 4.10e - 03        |
| <b>DUSP5</b>    | <b>Dual-specificity phosphatase 5</b>                                              | <b>Nucleus</b>             | <b>Phosphatase</b>         | <b>1.930</b> | <b>2.05e - 03</b> |
| <b>HBEGF</b>    | <b>Heparin-binding EGF-like growth factor</b>                                      | <b>Extracellular space</b> | <b>growth factor</b>       | <b>1.920</b> | <b>2.89e - 03</b> |
| <i>RGMB</i>     | RGM domain family, member B                                                        | Plasma membrane            | Other                      | 1.900        | 2.42e - 04        |
| <b>CXCL2</b>    | <b>Chemokine (C-X-C motif) ligand 2</b>                                            | <b>Extracellular space</b> | <b>Cytokine</b>            | <b>1.890</b> | <b>1.29e - 03</b> |
| <i>ADAMTS6</i>  | ADAM metalloproteinase with thrombospondine type 1 motif, 6                        | Extracellular space        | Peptidase                  | 1.840        | 5.77e - 03        |
| <i>HMGA2</i>    | High-mobility group AT-hook 2                                                      | Nucleus                    | Other                      | 1.840        | 1.64e - 03        |
| <i>EDG1</i>     | Sphingosine-1-phosphate receptor 1                                                 | Plasma membrane            | G protein-coupled receptor | 1.820        | 3.25e - 04        |
| <i>MICAL2</i>   | Microtubule-associated monooxygenase, calponin and LIM domain containing 2         | Cytoplasm                  | Other                      | 1.800        | 1.18e - 03        |
| <b>CCND1</b>    | <b>Cyclin D1</b>                                                                   | <b>Nucleus</b>             | <b>Other</b>               | <b>1.780</b> | <b>6.51e - 03</b> |
| <i>EPHB2</i>    | EPH receptor B2                                                                    | Plasma membrane            | Kinase                     | 1.780        | 1.01e - 03        |
| <b>SERPINE1</b> | <b>Serpine peptidase inhibitor, clade E, member 1</b>                              | <b>Extracellular space</b> | <b>Other</b>               | <b>1.770</b> | <b>8.82e - 03</b> |
| <i>DDR2</i>     | Discoidin domain receptor tyrosine kinase 2                                        | Plasma membrane            | Kinase                     | 1.720        | 3.38e - 03        |
| <i>PTHLH</i>    | Parathyroid hormone-like hormone                                                   | Extracellular space        | Other                      | 1.710        | 1.39e - 03        |
| <i>EMP1</i>     | Epithelial membrane protein 1                                                      | Plasma membrane            | Other                      | 1.690        | 4.14e - 03        |
| <i>FAM132B</i>  | Family with sequence similarity 132, member B                                      | Unknown                    | Other                      | 1.680        | 2.48e - 03        |
| <i>FRMD6</i>    | FERM domain containing 6                                                           | Cytoplasm                  | Other                      | 1.680        | 4.08e - 03        |
| <i>SRGAP1</i>   | SLIT-ROBO Rho GTPase activating protein 1                                          | Unknown                    | Other                      | 1.680        | 6.70e - 04        |
| <i>KCNMA1</i>   | Potassium large conductance calcium-activated channel, subfamily M, alpha member 1 | Plasma membrane            | ion channel                | 1.670        | 9.85e - 04        |
| <i>PTPN22</i>   | Protein tyrosine phosphatase, nonreceptor type 22 (lymphoid)                       | Cytoplasm                  | Phosphatase                | 1.670        | 1.35e - 03        |
| <b>RND3</b>     | <b>Rho family GTPase 3</b>                                                         | <b>Cytoplasm</b>           | <b>Enzyme</b>              | <b>1.660</b> | <b>1.73e - 03</b> |
| <i>BCAR3</i>    | Breast cancer antiestrogen resistance 3                                            | Cytoplasm                  | Other                      | 1.650        | 3.80e - 03        |
| <i>FLB32255</i> | Hypothetical protein Loc643977                                                     | Unknown                    | Other                      | 1.650        | 3.90e - 03        |
| <i>ANKRD55</i>  | Ankyrin repeat domain 55                                                           | Nucleus                    | Transcription regulator    | 1.620        | 2.20e - 03        |
| <i>GADD45A</i>  | Growth arrest and DNA damage-inducible, alpha                                      | Nucleus                    | Other                      | 1.620        | 2.25e - 03        |
| <i>PDGFA</i>    | Platelet-derived growth factor alpha polypeptide                                   | Extracellular space        | Growth factor              | 1.620        | 9.14e - 04        |
| <i>CD274</i>    | CD274 molecule                                                                     | Plasma membrane            | Other                      | 1.610        | 4.15e - 04        |
| <i>PDCD1LG2</i> | Programmed cell death 1 ligand 2                                                   | Plasma membrane            | Other                      | 1.610        | 3.80e - 03        |
| <i>F3</i>       | Coagulation factor III (thromboplastin, tissue factor)                             | Plasma membrane            | Transmembrane receptor     | 1.600        | 1.74e - 03        |
| <i>MTHFD2</i>   | Methylenetetrahydrofolate dehydrogenase (NADP+ dependent) 2                        | Cytoplasm                  | Enzyme                     | 1.600        | 7.73e - 03        |
| <i>DNER</i>     | Delta/notch-like EGF repeat containing                                             | Plasma membrane            | Transmembrane receptor     | 1.590        | 1.49e - 03        |
| <i>CEBPG</i>    | CCAAT/enhancer binding protein (C/EBP), gamma                                      | Nucleus                    | Transcription regulator    | 1.580        | 6.97e - 03        |
| <i>FAM40B</i>   | Family with sequence similarity 40, member B                                       | Unknown                    | Other                      | 1.580        | 9.61e - 03        |
| <b>PIK3CD</b>   | <b>Phosphoinositide-3-kinase, catalytic, delta polypeptide</b>                     | <b>Cytoplasm</b>           | <b>Kinase</b>              | <b>1.570</b> | <b>2.64e - 03</b> |
| <i>ARHGEF2</i>  | Rho/Rac guanine nucleotide exchange factor (GEF) 2                                 | Cytoplasm                  | Other                      | 1.560        | 5.52e - 03        |
| <i>STX1A</i>    | Syntaxin 1A (brain)                                                                | Cytoplasm                  | Transporter                | 1.560        | 3.76e - 03        |
| <i>TRIB1</i>    | Tribbles homolog 1 ( <i>Drosophila</i> )                                           | Cytoplasm                  | Kinase                     | 1.560        | 2.19e - 03        |
| <i>ENOX1</i>    | Ecto-NOX disulfide-thiol exchanger 1                                               | Unknown                    | Other                      | 1.550        | 1.25e - 03        |
| <i>TMCC3</i>    | Transmembrane and coiled-coil domain family 3                                      | Unknown                    | Other                      | 1.550        | 1.42e - 03        |
| <i>GARS</i>     | Glycyl-tRNA synthetase                                                             | Cytoplasm                  | Enzyme                     | 1.540        | 5.75e - 03        |
| <i>PIK3AP1</i>  | Phosphoinositide-3-kinase adaptor protein 1                                        | Cytoplasm                  | Other                      | 1.540        | 3.76e - 03        |
| <i>USP53</i>    | Ubiquitin-specific peptidase 53                                                    | Unknown                    | Enzyme                     | 1.540        | 5.53e - 04        |
| <i>SLC38A1</i>  | Solute carrier family 38, member 1                                                 | Plasma membrane            | Transporter                | 1.530        | 3.05e - 03        |
| <i>DUSP4</i>    | Dual-specificity phosphatase 4                                                     | Nucleus                    | Phosphatase                | 1.520        | 1.73e - 03        |
| <i>FOXQ1</i>    | Forkhead box Q1                                                                    | Nucleus                    | Transcription regulator    | 1.520        | 1.51e - 03        |
| <b>IL11</b>     | <b>Interleukin 11</b>                                                              | <b>Extracellular space</b> | <b>Cytokine</b>            | <b>1.520</b> | <b>8.34e - 04</b> |

**Table W1.** (continued)

| Gene Symbol          | Entrez Gene Name                                     | Location         | Type(s)                        | Fold Change  | <i>P</i>          |
|----------------------|------------------------------------------------------|------------------|--------------------------------|--------------|-------------------|
| <i>MYADM</i>         | Myeloid-associated differentiation marker            | Nucleus          | Other                          | 1.520        | 4.26e - 03        |
| <i>MB2</i>           | Metastasis-related protein mb2                       | Unknown          | Other                          | 1.520        | 5.95e - 03        |
| <b><i>AKAP12</i></b> | <b>A kinase (PRKA) anchor protein 12</b>             | <b>Cytoplasm</b> | <b>Transporter</b>             | <b>1.510</b> | <b>6.02e - 03</b> |
| <i>PHACTR2</i>       | Phosphatase and actin regulator 2                    | Unknown          | Other                          | 1.510        | 5.86e - 03        |
| <i>RASA3</i>         | RAS p21 protein activator 3                          | Plasma membrane  | Other                          | 1.510        | 1.01e - 04        |
| <i>SARS</i>          | Seryl-tRNA synthetase                                | Cytoplasm        | Enzyme                         | 1.510        | 8.21e - 03        |
| <b><i>FOSL1</i></b>  | <b>FOS-like antigen 1</b>                            | <b>Nucleus</b>   | <b>Transcription regulator</b> | <b>1.510</b> | <b>1.60e - 03</b> |
| <i>KLF6</i>          | Kruppel-like factor 6                                | Nucleus          | Transcription regulator        | 1.510        | 6.73e - 04        |
| <i>RGS7</i>          | Regulator of G protein signaling 7                   | Cytoplasm        | Enzyme                         | 1.500        | 8.44e - 04        |
| <i>GEM</i>           | GTP binding protein overexpressed in skeletal muscle | Plasma membrane  | Enzyme                         | 1.500        | 7.04e - 04        |
| <i>IRAK2</i>         | Interleukin-1 receptor-associated kinase 2           | Plasma membrane  | Kinase                         | 1.500        | 1.93e - 03        |
| <i>SH2D5</i>         | SH2 domain containing 5                              | Unknown          | Other                          | 1.500        | 1.76e - 03        |
| <i>WIPF3</i>         | WAS/WASL interacting protein family, member 3        | Plasma membrane  | Other                          | 1.500        | 4.22e - 03        |

Summary of microarray data analysis (Gene Expression Omnibus data set GSE28167) showing messenger RNA up-regulation (>1.5 fold) in U251 glioma cells migrating on aligned *versus* randomly oriented nanofibers. Genes in bold face emphases have been described in the literature as regulators or targets of JAK/STAT signaling [24–26]. Results were analyzed by BRB-Array Tools software using a modified *t* test with random variance (*P* < .05 indicates statistically significant differences).

**Table W2.** Gene Ontology Analysis Identifies a Cell Motility Signature Upregulated in Glioma Cells Migrating on Aligned Nanofibers.

| Top Functional Networks                               |                                                          |                                                                                                     | Upregulated Genes Associated with This Network                                                                                                                                |                 |
|-------------------------------------------------------|----------------------------------------------------------|-----------------------------------------------------------------------------------------------------|-------------------------------------------------------------------------------------------------------------------------------------------------------------------------------|-----------------|
| ID                                                    | Score                                                    | Top Functions                                                                                       | Upregulated Genes Associated with This Network                                                                                                                                | Fold Enrichment |
| 1                                                     | 52                                                       | <b>Cellular movement</b> , hematological system development and function, hematopoiesis             | <i>ALDH1A3, ARHGAP2, ASNS, CD55, CD274, CEBPG, CTH, CXCL2, CXCL3, DUSP5, F3, GARS, HMG2, IL11, IL8, IRAK2, KLF2, MTHFD2, PDGFA, PSAT1, RND3, SERPINE1, SPHK1, TRIB3, TSLP</i> |                 |
| 2                                                     | 40                                                       | Tissue morphology, <b>cellular movement</b> , skeletal and muscular system development and function | <i>AKAP12, CAMK2N1, CCND1, DDR2, DNER, DUSP4, EMP1, EPHB2, FOSL1, GEM, IL11, KLIF, PDGFA, PIK3CD, PTHLH, RGS7, TMEM158, TRIB1</i>                                             |                 |
| 3                                                     | 23                                                       | Cellular development, cellular growth and proliferation, cellular function and maintenance          | <i>BTBD11, DNER, FAM40B, FOXQ1, FRMD6, MGLL, PHACTR2, PTPN22, RAS43, SRS, SH2D5, USP53</i>                                                                                    |                 |
| 4                                                     | 20                                                       | Immunologic disease, inflammatory disease, renal nephritis                                          | <i>BCAR3, CBS, GADD45A, HBEGF, IL11, KCNMA1, MICAL2, NT5E, PDCD1LG2, PIK3AP1, PPP1R15A, PTPN22, STX1A</i>                                                                     |                 |
| 5                                                     | 9                                                        | Cell death, cellular development, cellular growth and proliferation                                 | <i>ENOX1, NAV3, RGS7, SERPINE1, SLC38A1, SRGAP1, WIPF3</i>                                                                                                                    |                 |
| <b>(B) DAVID Bioinformatics Resources (NIH/NIAD):</b> |                                                          |                                                                                                     |                                                                                                                                                                               |                 |
| Top Annotation Clusters                               |                                                          |                                                                                                     |                                                                                                                                                                               |                 |
| Annotation Cluster 1: Enrichment Score: 2.4295        |                                                          |                                                                                                     |                                                                                                                                                                               |                 |
| GO Category                                           | Term                                                     | Upregulated Genes Associated with This Cluster                                                      | P                                                                                                                                                                             | Fold Enrichment |
| GOTERM_BP_FAT                                         | GO:0040017~ <b>positive regulation of locomotion</b>     | <i>IL8, PDGFA, F3, SPHK1, HBEGF</i>                                                                 | .00081                                                                                                                                                                        | 11.6984         |
| GOTERM_BP_FAT                                         | GO:0042060~wound healing                                 | <i>KLIF6, PDGFA, F3, SERPINE1, HBEGF, IL11</i>                                                      | .00133                                                                                                                                                                        | 7.2028          |
| GOTERM_BP_FAT                                         | GO:0032101~regulation of response to external stimulus   | <i>IL8, PDGFA, F3, SERPINE1, NT5E</i>                                                               | .00476                                                                                                                                                                        | 7.2103          |
| GOTERM_BP_FAT                                         | GO:0030193~regulation of blood coagulation               | <i>PDGFA, F3, SERPINE1</i>                                                                          | .01036                                                                                                                                                                        | 19.1073         |
| GOTERM_BP_FAT                                         | GO:0050818~regulation of coagulation                     | <i>PDGFA, F3, SERPINE1</i>                                                                          | .01330                                                                                                                                                                        | 16.7772         |
| Annotation Cluster 2: Enrichment Score: 2.26307       |                                                          |                                                                                                     |                                                                                                                                                                               |                 |
| GO Category                                           | Term                                                     | Genes                                                                                               | P                                                                                                                                                                             | Fold Enrichment |
| GOTERM_BP_FAT                                         | GO:0040017~ <b>positive regulation of locomotion</b>     | <i>IL8, PDGFA, F3, SPHK1, HBEGF</i>                                                                 | .00081                                                                                                                                                                        | 11.69834        |
| GOTERM_BP_FAT                                         | GO:0042060~wound healing                                 | <i>KLIF6, PDGFA, F3, SERPINE1, HBEGF, IL11</i>                                                      | .00133                                                                                                                                                                        | 7.2028          |
| GOTERM_BP_FAT                                         | GO:0040012~ <b>regulation of locomotion</b>              | <i>IL8, PDGFA, F3, SPHK1, HBEGF, TRIB1</i>                                                          | .00136                                                                                                                                                                        | 7.1652          |
| GOTERM_BP_FAT                                         | GO:0030334~ <b>regulation of cell migration</b>          | <i>PDGFA, F3, SPHK1, HBEGF, TRIB1</i>                                                               | .00590                                                                                                                                                                        | 6.7836          |
| GOTERM_BP_FAT                                         | GO:0030335~ <b>positive regulation of cell migration</b> | <i>PDGFA, F3, SPHK1, HBEGF</i>                                                                      | .00654                                                                                                                                                                        | 10.3051         |
| GOTERM_BP_FAT                                         | GO:0051272~ <b>positive regulation of cell motion</b>    | <i>PDGFA, F3, SPHK1, HBEGF</i>                                                                      | .00852                                                                                                                                                                        | 9.3587          |
| GOTERM_BP_FAT                                         | GO:0051270~ <b>regulation of cell motion</b>             | <i>PDGFA, F3, SPHK1, HBEGF, TRIB1</i>                                                               | .00935                                                                                                                                                                        | 5.9401          |
| GOTERM_CC_FAT                                         | GO:0009986~cell surface                                  | <i>KCNMA1, IRAK2, PDGFA, F3, CD274, HBEGF</i>                                                       | .01544                                                                                                                                                                        | 4.0069          |
| PANTHER_PATHWAY                                       | P00005:Angiogenesis                                      | <i>PDGFA, DNER, F3, PIK3CD, SPHK1, EPHB2</i>                                                        | .06108                                                                                                                                                                        | 2.6626          |

Genes upregulated in U251 glioma cells migrating on aligned *versus* randomly oriented nanofibers (Table W1) were analyzed using Ingenuity Pathway Analysis software (A) and DAVID bioinformatics resources (B). Results from both analyses revealed a cluster of genes associated with increased cell locomotion. Genes in bold face emphases have been described in the literature as targets and/or regulators of JAK/STAT signaling.

**Table W3.** List of Primers Used for Quantitative RT-PCR.

| Gene            | Forward Sequence 5' → 3' | Reverse Sequence 5' → 3' |
|-----------------|--------------------------|--------------------------|
| <i>CAMK2N1</i>  | TATTGAAGATGATAGGATTG     | AATTTTGACAAATAGCTGCA     |
| <i>CAPS</i>     | AGCTGCATTGCCAAGCTGG      | GCTGTAGTAGTCCTGGAATT     |
| <i>CCND1</i>    | GCGRAGTAGGACAGGAAGTT     | GAACAAACAGATCATCCGAAAC   |
| <i>CXCL2</i>    | ACTGAACTGCGCTGCCAGTG     | TTCTGCCCATTCTTGAGTGT     |
| <i>CXCL3</i>    | TCAAGAACATCCAAAGTGTG     | TTGTTTCTGATCTTTTCGAT     |
| <i>EDG1</i>     | TATGCCAGTATGCTCTGGCT     | CGATGAGTATCCAGGCTTT      |
| <i>EDNRB</i>    | ATGTGTAAGCTGGTGCCTTT     | TTTGGAACCCCAATTCCTTT     |
| <i>EMP1</i>     | ATGGAGAAGGGAACCGGTT      | GATACTGCGTCCATCACGA      |
| <i>IL-8</i>     | AGACATACTCCAAACCTTTC     | TCTGCACCAGTTTTCTTTG      |
| <i>IL-11</i>    | AAATTCCCAGCTGACGGGGA     | AAATAAATAAGATCTGGCTTTG   |
| <i>KLF2</i>     | GACTTAGGGTGGTAAAGGC      | CATGGACAGGATGAATCCA      |
| <i>MMP2</i>     | CCATCGAGACCATGCGGAAG     | CCTGTATGTGATCTGGTCTTCTG  |
| <i>MMP9</i>     | TCATCCAGTTTGGTGTCCGG     | GACCACAACCTCGTCGTCGTC    |
| <i>MMP13</i>    | GAGGTGACTGGCAAACCTGA     | ATATCAGGGGTGTAATTCAC     |
| <i>PARP9</i>    | AAATGTCCTGTGCCTCCAAC     | ACTCTGCATACCACATTGCA     |
| <i>PDGFA</i>    | AGTGAGGATTCTTTGGACCAC    | TTGACACTGCTCGTGTGCA      |
| <i>PDGFRA</i>   | TACCAGGGAGGTCAAAGAAA     | TTCTGAATCTTTCCACAT       |
| <i>PI15</i>     | GATTATGCTTTTCCATATCCC    | ATCCTATCCGATTGGAAGTG     |
| <i>RND3</i>     | AATAGAGTTGAGCCTGTGGG     | ATCAGACTTGCAGCCGACCA     |
| <i>SERPINE1</i> | TTTCAGAGGTGGAGAGAGCC     | AAGGGAGTCTTCCACTGGCC     |
| <i>SES3</i>     | GTTTCATGTCAATCTACTTTT    | TCATGATTTATGATCAGTAT     |
| <i>SOX4</i>     | TAGTTCTTGCACGCTCTTTA     | TTCCCTGAAGCAGTTGATTC     |
| <i>SOX13</i>    | AAGGAGCTCCAGCTTCTGGT     | AGGAGGTTGATCTTATGCTG     |
| <i>SOX21</i>    | AAGATGCACAACCTCGGAGAT    | CGACGAGATCTCTGCCATT      |
| <i>SPHK1</i>    | CTGGTGGTCAATGTCTGGAGA    | CAGCAATAGCGTGCAGTTGG     |
| <i>STC1</i>     | TTGCATGCCTGGAAAACCTCC    | CCGTTGGCGATGCATTTTAA     |
| <i>STX1A</i>    | TCAAGTACCAGAGCAAGGC      | GCAGATGATGATCATGATTT     |
| <i>VANGL2</i>   | AGCGTCGCTGGATTTCTCT      | ATCTCGACTCTTAGAGCGGT     |

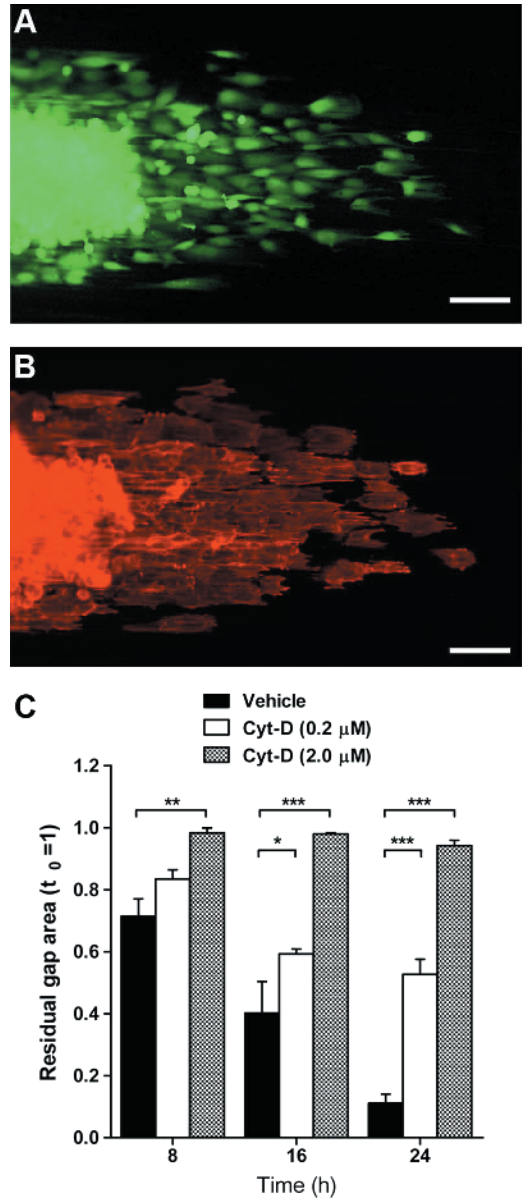

**Figure W2.** Inhibition of actin polymerization disrupts two-dimensional glioma cell migration. (A) Representative image of unfixed, CMFDA-labeled U251 glioma cells migrating out of a spheroid deposited on aligned nanofibers. (B) Same cells from A, imaged after fixation and staining with phalloidin-Alexa 594 to detect actin F. The staining was mostly cortical and diffuse. Bars, 100 μm. (C) Effect of cytochalasin D (Cyt-D) on the migration of U251 cells, measured using a wound healing assay. Cell migration was significantly inhibited at 2.0 μM Cyt-D and completely abolished at 2 μM due in part to cell detachment. \**P* < .05, \*\**P* < .01, \*\*\**P* < .001 by two-way ANOVA for repeated measures.

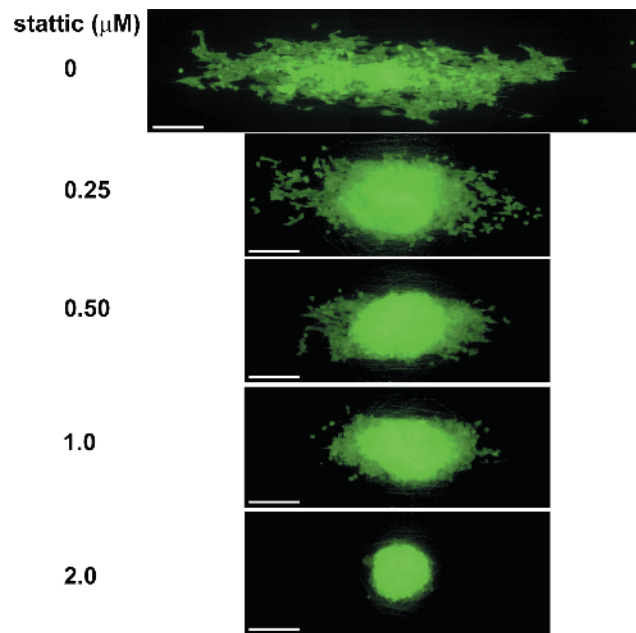

**Figure W3.** STAT3 inhibitors disrupt glioma cell migration. Representative images of G9 spheroids (glioblastoma-derived initiating cells) cultured on aligned nanofibers scaffolds in the presence of increasing concentrations of the STAT3 inhibitor static. Notice the reduction of cell dispersion along the major axis of the scaffold, without a noticeable decrease in fluorescence (ratio of integrated fluorescence/area remained approximately constant). Bars, 200  $\mu\text{m}$ .

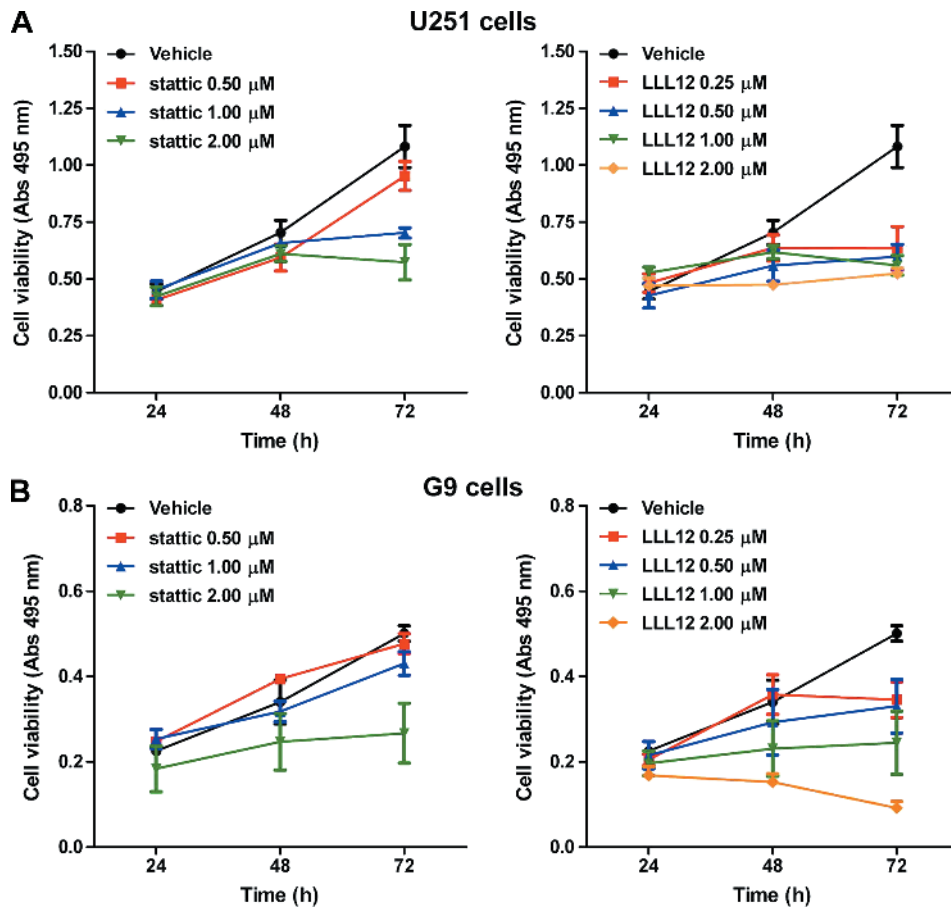

**Figure W4.** STAT3 inhibitors do not disrupt cell viability at early culture times. U251 (A) and G9 (B) glioma cell were cultured on aligned nanofiber for 24 to 72 hours in the presence of the STAT3 inhibitors static and LLL12. Toxicity of these compounds was measured using an assay for metabolic reduction of tetrazolium. Results showed that neither static nor LLL12 reduced cell viability in the conditions at which they inhibited cell migration (0.5-2  $\mu$ M for up to 24 hours). Negative effects on cell viability were observed only at the highest concentrations tested and longer incubation times (>48 hours).

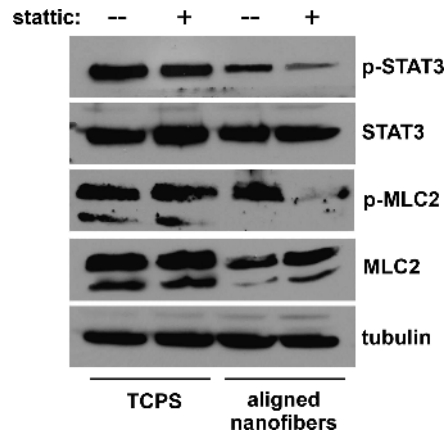

**Figure W5.** STAT3 inhibition reduces MLC2 phosphorylation of cells cultured on aligned nanofibers. U251 glioma cells were cultured on aligned nanofibers or TCPS for 24 hours in the presence of 1  $\mu$ M static, collected, and processed for Western blot analysis. Results showed that a low concentration of the STAT3 inhibitor partially reduced STAT3 phosphorylation in cells of myosin II, MLC2. In contrast, neither STAT3 nor MLC2 phosphorylation was affected by the same treatment when cells were cultured on TCPS.

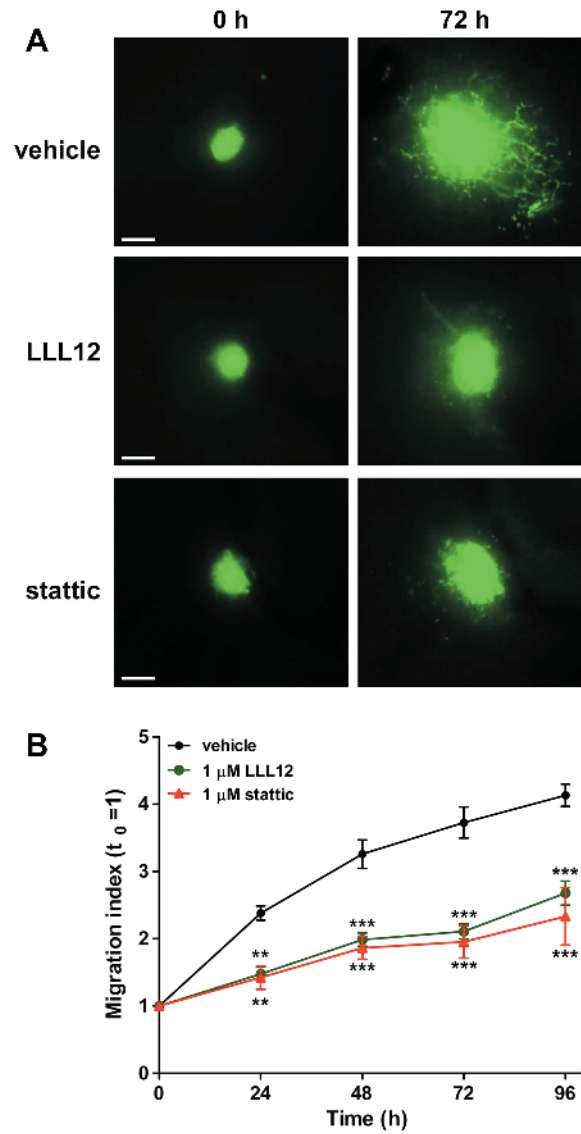

**Figure W6.** STAT3 inhibition reduces cell dispersion in cultured brain slices. G9 glioma cells were treated with 1  $\mu$ M static of 1  $\mu$ M LLL12 overnight and deposited on brain slices prepared as described in the Materials and Methods section. Dispersion of the cells in the tissue slice was followed by fluorescence microscopy for 96 hours. (A) Cell migration followed a pattern of dispersion with typical trails of cells dispersing out of tumorspheres, which was abolished by the pharmacological treatments. (B) Quantitative results indicated that cell dispersion had been significantly reduced by treatment with low concentrations of the STAT3 inhibitors, in agreement with the results observed using nanofiber scaffolds.  $**P < .01$ ,  $***P < .001$  by two-way ANOVA for repeated measures. Bars, 200  $\mu$ m.
